# Supplementary material for: The effect of androgen excess on maternal metabolism, placental function and fetal growth in obese dams
Source: PubMed Central journal article supplement (PMC5556034; doi:10.1038/s41598-017-08559-w), 2017-08-14

**The effect of androgen excess on maternal metabolism, placental function and fetal growth in obese dams**

Romina Fornes<sup>1</sup>, Manuel Maliqueo<sup>1,3</sup>, Min Hu<sup>3</sup>, Laila Hadi<sup>3</sup>, Miguel Jimenez<sup>4</sup>, Kerstin Ebefors<sup>3</sup>, Jenny Nyström<sup>3</sup>, Fernand Labrie<sup>5</sup>, Thomas Jansson<sup>7</sup>, Anna Benrick<sup>3,7</sup>, Elisabet Stener-Victorin<sup>1\*</sup>

1. Department of Physiology, Department of Physiology and Pharmacology, Karolinska Institutet, 171 77 Stockholm, Sweden
2. Endocrinology and Metabolism Laboratory, Department of Medicine, West division, University of Chile, Santiago, Chile
3. Department of Physiology, Institute of Neuroscience and Physiology, Sahlgrenska Academy, University of Gothenburg, Sweden
4. Unidad Académica Multidisciplinaria Reynosa Aztlán, Universidad Autónoma de Tamaulipas, Reynosa, Tamaulipas, México
5. Laval University Research Center in Molecular Endocrinology, Oncology and Human Genomics, CHUL Research Center, Quebec, G1V 4G2, Canada.
6. Department of Obstetrics & Gynecology, Division of Reproductive Sciences, University Colorado Anschutz Medical Campus, Aurora, Colorado 80045, USA.
7. School of Health and Education, University of Skövde, 54128 Skövde, Sweden.

***Corresponding author and person to whom reprint should be addressed \****

Elisabet Stener-Victorin

Department of Physiology and Pharmacology

Karolinska Institutet

17177 Stockholm, Sweden

Phone: +46 705643655

E-mail: [elisabet.stener-victorin@ki.se](mailto:elisabet.stener-victorin@ki.se)

**Supplementary Tables****Antibody Table 1.** Antibodies and conditions used in Western blot analysis.

| Antibody Name              | Company | Catalog  | Dilution |
|----------------------------|---------|----------|----------|
| Progesterone Receptor A-B  | SCB     | sc539    | 1:500    |
| Estrogen Receptor $\alpha$ | SCB     | sc542    | 1:500    |
| Estrogen Receptor $\beta$  | SCB     | sc8974   | 1:1000   |
| Androgen Receptor          | SCB     | sc-816   | 1:200    |
| Glucocorticoid Receptor    | SCB     | sc-1004  | 1:500    |
| CYP11A1                    | SCB     | sc292456 | 1:500    |
| 17- $\beta$ HSD type2      | SCB     | sc135042 | 1:500    |
| Adiponectin Receptor 2     | SCB     | Sc514045 | 1:500    |

CYP11A1: cytochrome P450 family 11 subfamily A member 1. 17- $\beta$ HSD type2: 17beta-hydroxysteroid Dehydrogenase 2.

**Oligonucleotides Table 2.** Oligonucleotides.

| <b>Gene</b>                                      |               |         | <b>Sequence 5'-3'</b>     |
|--------------------------------------------------|---------------|---------|---------------------------|
| Acetyl-CoA Carboxylase alpha                     | <i>Acaca</i>  | Forward | GCCTCTTCCTGACAAACGAG      |
|                                                  | <i>Acaca</i>  | Reverse | TGACTGCCGAAACATCTCTG      |
| Fatty acid syntase                               | <i>Fasn</i>   | Forward | GGAGGTGGTGATAGCCGGTAT     |
|                                                  | <i>Fasn</i>   | Reverse | TGGGTAATCCATAGAGCCCAG     |
| Stearoyl-CoenzymeA desaturase 1                  | <i>Scd1</i>   | Forward | TTCTTGCATACACTCTGGTGC     |
|                                                  | <i>Scd1</i>   | Reverse | CGGGATTGAATGTTCTTGTCGT    |
| sterol regulatory element-binding factor 1       | <i>Srebf1</i> | Forward | GCCCTACCGGTCTTCTATCA      |
|                                                  | <i>Srebf1</i> | Reverse | TCCTGCTTGAGCTTCTGGTT      |
| Liver X receptor (NR1H3)                         | <i>Lxr</i>    | Forward | CTCAATGCCTGATGTTTCTCCT    |
|                                                  | <i>Lxr</i>    | Reverse | TCCAACCCTATCCCTAAAGCAA    |
| Peroxisome proliferator activated receptor gamma | <i>Pparg</i>  | Forward | CCCACCAACTTCGGAATCA       |
|                                                  | <i>Pparg</i>  | Reverse | TGCGAGTGGTCTTCCATCAC      |
| Ribosomal protein L19                            | <i>Rpl19</i>  | Forward | CGAAGGGTACTGCCAATGCT      |
|                                                  | <i>Rpl19</i>  | Reverse | TCCATGAGGATGCGCTTGTT      |
| Apolipoprotein A-I                               | <i>Apoa1</i>  | Forward | GGCACGTATGGCAGCAAGAT      |
|                                                  | <i>Apoa1</i>  | Reverse | CCAAGGAGGAGGATTCAAAGT     |
| Fat storage-inducing transmembrane protein 1     | <i>Fitm1</i>  | Forward | TGCTTACGGCGCCTCTAC        |
|                                                  | <i>Fitm1</i>  | Reverse | CACAACTTTATGTTGAAGAAGTTGC |

## Supplementary Figures

**Supplementary Figure 1. Study Design.** Females were fed with CD (n=25) or HF/HS (n= 27) during 4 to 10 weeks until mice in the HF/HS group gained at least 25% in weight over their own weight at the beginning of the study. In a first experiment, the obese animal together with a CD fed mouse were subjected to a DEXA and mated overnight with a male on control diet. The presence of a post copulation plug was confirmed the following morning which was defined as gestational day (GD) 0.5. During pregnancy At GD 15.5 the HF/HS and CD groups were subdivided and assigned to receive a 100  $\mu$ l subcutaneous injection in the interscapular area of 250  $\mu$ g/kg of 5 $\alpha$ -Androstan-17 $\beta$ -ol-3-one (DHT) or Vehicle alone for two days (until GD 17.5). On day 18.5 animals were fasted for 4 hours, a second DEXA and OGTT was done. After that the pregnant female were anesthetized with 4% isoflurane inhalation, axillar blood was collected for sex steroid analyses and finally sacrificed by heart puncture. The uterus was dissected and fetuses and placentas were collected and weighed. Further, the fetuses in this first experiment were assessed by Body composition analyses. Following the same design, a second experiment was done where the maternal liver and kidneys were removed from dams, and placenta and fetal liver were collected to perform qPCR and Western blot. All the fetuses were sacrificed by anesthesia inhalation immediately after collection.

**Supplementary Figure 2. CYP11A and 17-HSD II in placenta homogenates at GD 18.5** (A) Cholesterol side-chain cleavage enzyme (CYP11A). (B) 17 beta-Hydroxysteroid dehydrogenase type 2 (17 $\beta$ HSD2) in placenta homogenates from pregnant mice on GD 18.5 (CD-Veh, n=8; HF/HS, n=8; CD-DHT, n=8; HF/HS-DHT, n=10). Protein expression was quantified by western blot and normalized by total protein loaded in each line in the stain free blot. Values are means  $\pm$  SEM.

**Supplementary Figure 3. Adiponectin metabolism at day GD 18.5.** (A) High Molecular Adiponectin in maternal serum and (B) protein expression of Adiponectin receptor 2 in placenta homogenates on GD 18.5. (CD-Veh, n=8; HF/HS, n=8; CD-DHT, n=8; HF/HS-DHT, n=10). Protein expression was quantified by western blot and normalized by total protein loaded in each line in the stain free blot. Every blot image was cropped for publication and the full image of every blot is showed in Supplementary Figure 5. Values are means  $\pm$  SEM.

**Supplementary Figure 4.** Representative western blot for (A). Androgen receptor (AR), (B) Progesterone receptor A (PRA), (C) Progesterone receptor B (PRB), (D) Estrogen receptor  $\alpha$  (ER $\alpha$ ), (E) Estrogen receptor  $\beta$  (ER $\beta$ ), (F) Glucocorticoids receptor (GR), (G) Adiponectin Receptor 2 (AdipoR2), (H) Cholesterol side-chain cleavage enzyme (CYP11A1), (I) 17 beta-Hydroxysteroid dehydrogenase type 2 (17 $\beta$ HSD2). The blots were cropped at about 75 kD and probed with the respective antibody

according to the molecular weight. Images for progesterone receptor were captured at different times (40, 60 and 120 sec) in order to get the better resolution for the PRB. Images from 120 sec were selected for analysis.

## Supplementary Figure 1

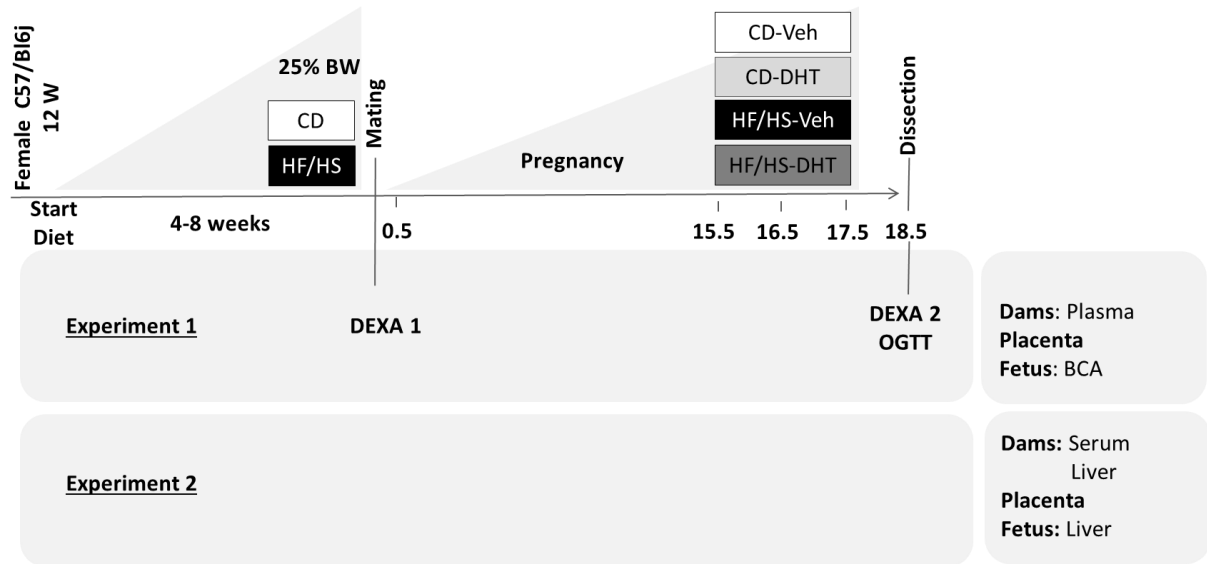

## Supplementary Figure 2

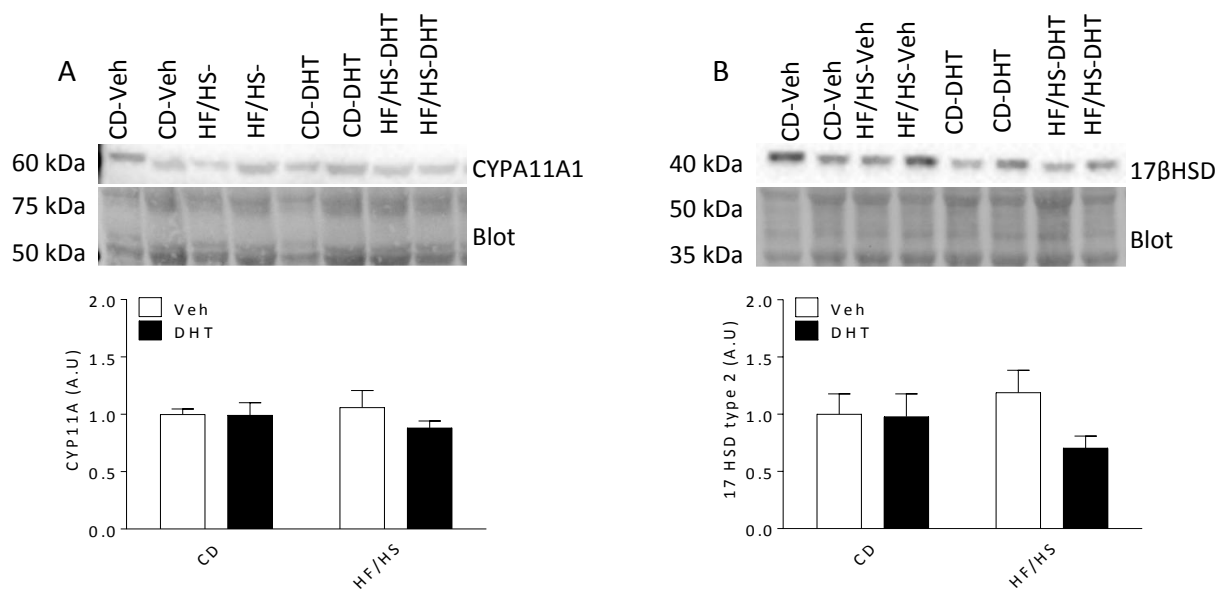

### Supplementary Figure 3

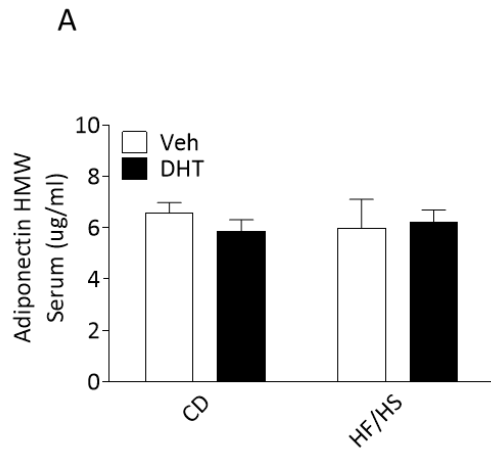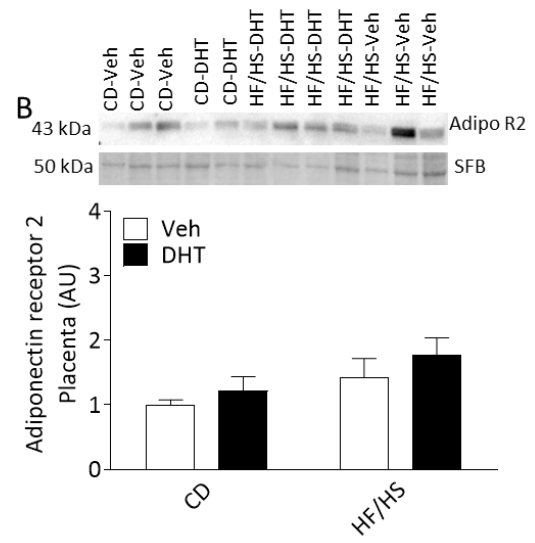



Supplementary Figure 4

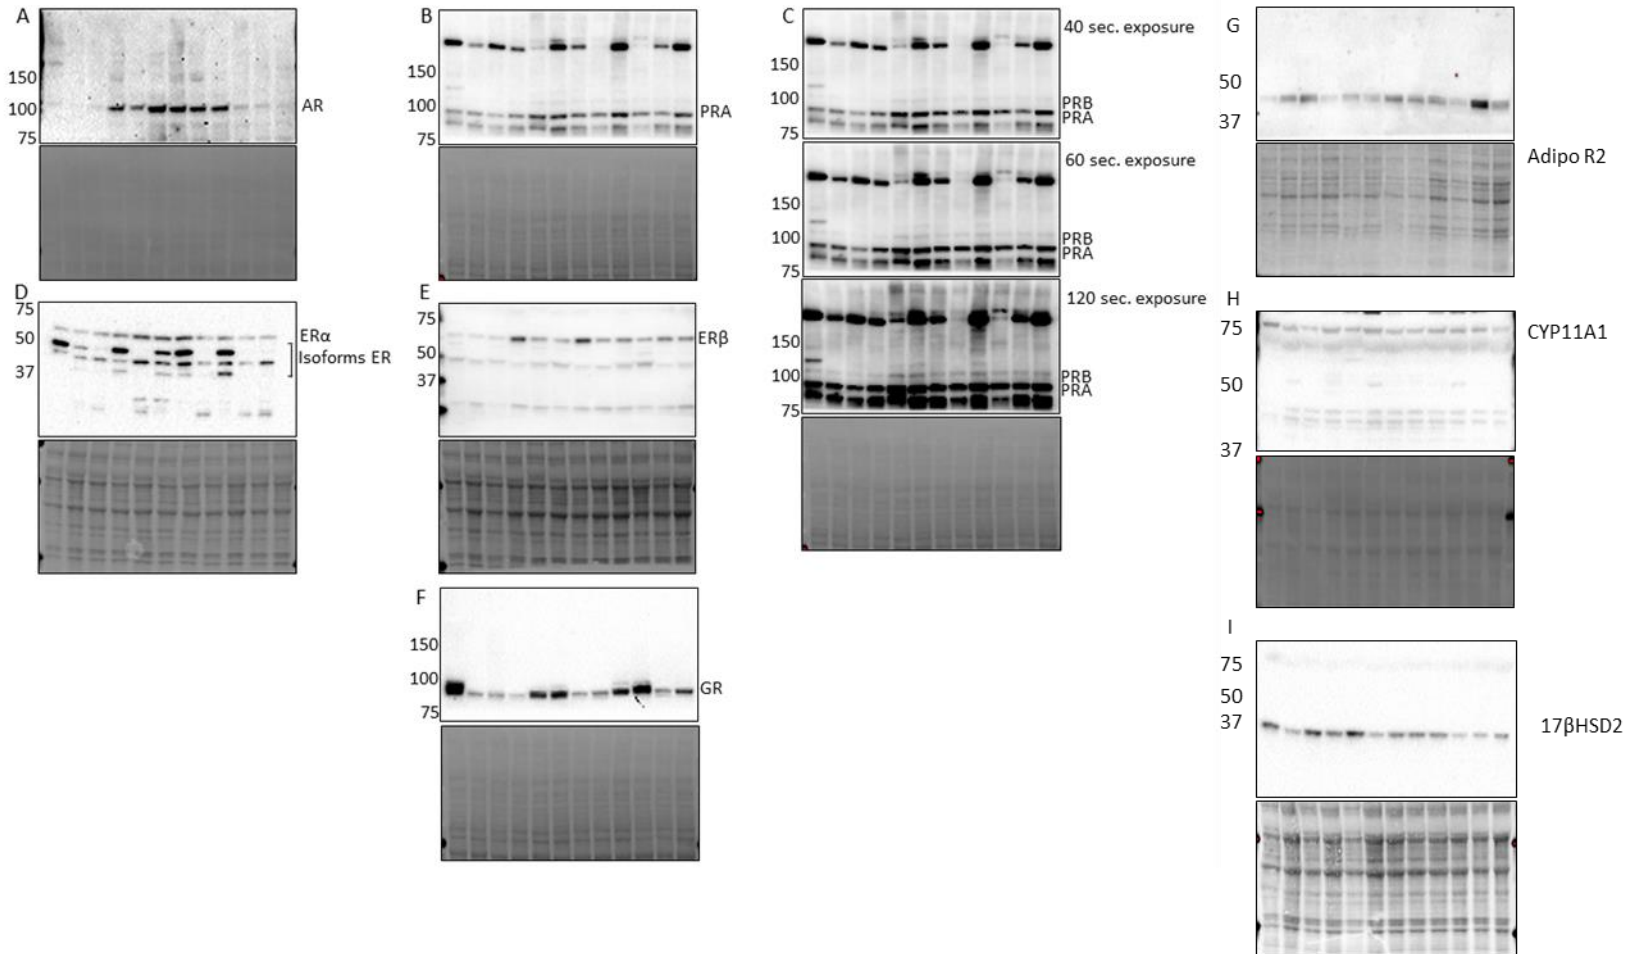

Supplement: 41598_2017_8559_MOESM1_ESM.pdf [file 41598_2017_8559_MOESM1_ESM.pdf]
